# Supplementary material for: Chinese traditional medicine (GuiZhi-ShaoYao-ZhiMu decoction) as an add-on medication to methotrexate for rheumatoid arthritis: a meta-analysis of randomized clinical trials
Source: PubMed Central journal article supplement — Ther Adv Chronic Dis. 2021 Feb 12;12:2040622321993438. doi: 10.1177/2040622321993438 (PMC7887670; doi:10.1177/2040622321993438), 2021-02-12
Supplement: sj-pdf-1-taj-10.1177_2040622321993438.pdf [file sj-pdf-1-taj-10.1177_2040622321993438.pdf]

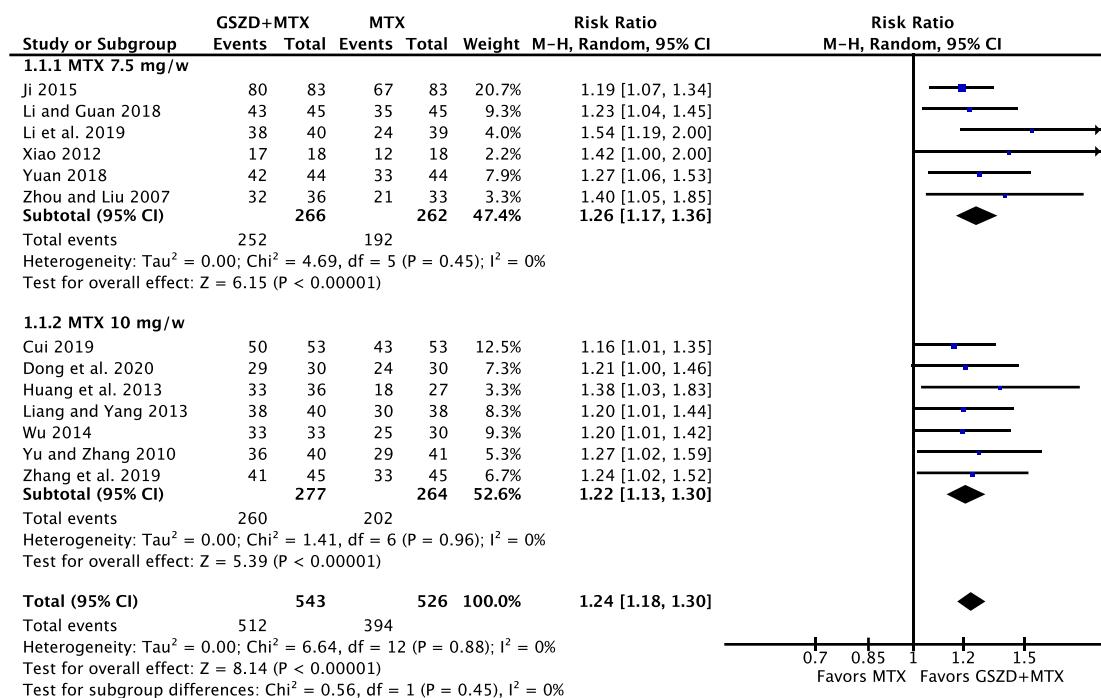

1

2 **Supplementary Figure 1 Forest plot indicating the adjuvant therapy of GSZD**3 **was independent of the dose of MTX. GuiZhi-ShaoYao-ZhiMu decoction; MTX:**4 **methotrexate; M-H: Mantel-Haenszel; CI: confidence interval.**

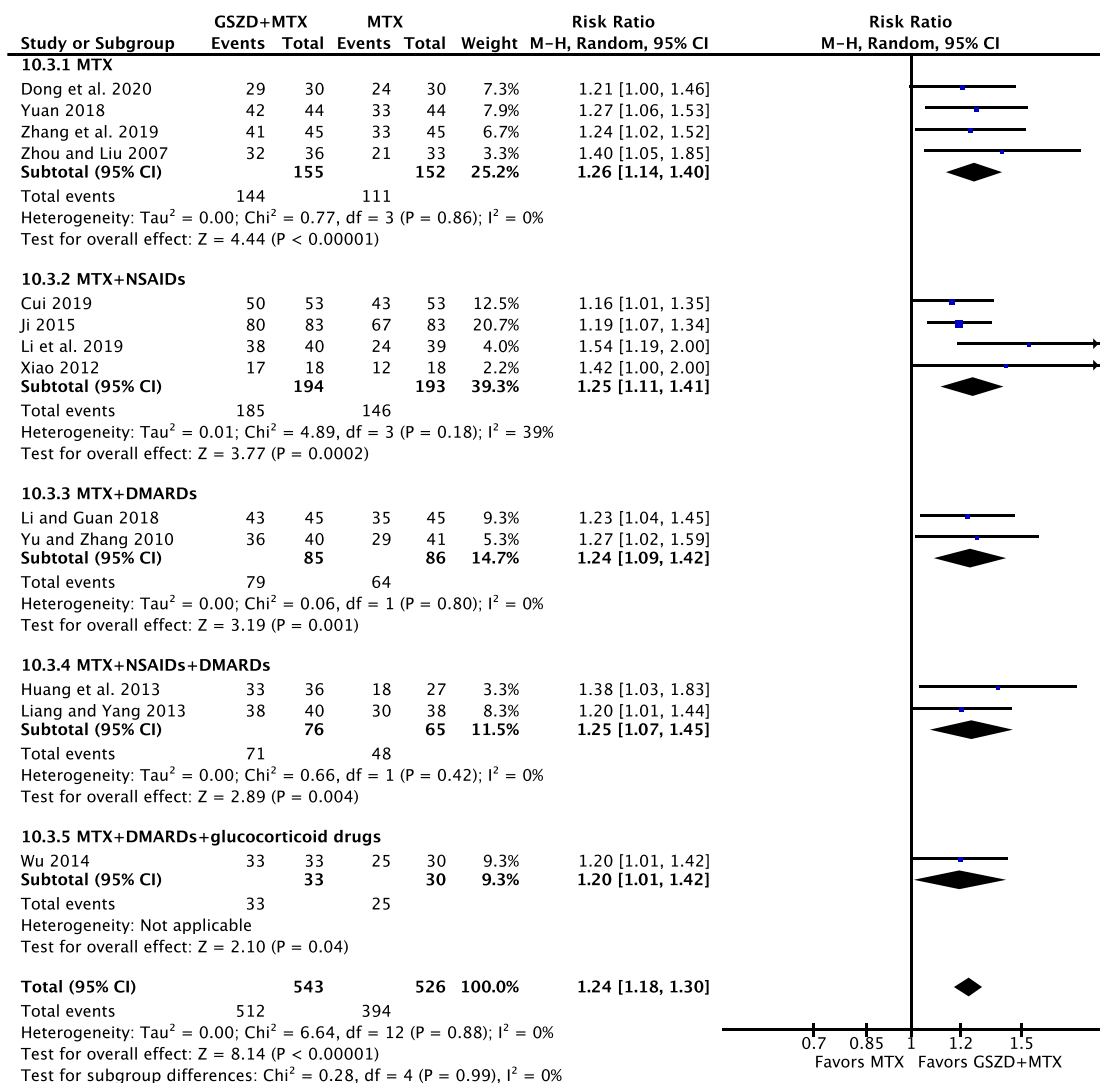

1

- 2 **Supplementary Figure 2. Subgroup meta-analysis indicating the adjuvant**  
3 **therapy of GSZD was independent of the combined utilization of other drugs.**  
4 GSZD: GuiZhi-ShaoYao-ZhiMu decoction; MTX: methotrexate; M-H: Mantel-  
5 Haenszel; CI: confidence interval.
