# Supplementary material for: Chinese traditional medicine (GuiZhi-ShaoYao-ZhiMu decoction) as an add-on medication to methotrexate for rheumatoid arthritis: a meta-analysis of randomized clinical trials
Source: PubMed Central journal article supplement — Ther Adv Chronic Dis. 2021 Feb 12;12:2040622321993438. doi: 10.1177/2040622321993438 (PMC7887670; doi:10.1177/2040622321993438), 2021-02-12
Supplement: sj-pdf-2-taj-10.1177_2040622321993438.pdf [file sj-pdf-2-taj-10.1177_2040622321993438.pdf]

1 **Supplementary Table 1 Search Strategy for the EMBASE**

| No. | Query                                                                                                                                         |
|-----|-----------------------------------------------------------------------------------------------------------------------------------------------|
| #1  | rheumatoid arthritis'/exp<br>(rheumatoid OR reumatoid OR revmatoid OR rheumatic OR reumatic OR                                                |
| #2  | revmatic OR rheumat* OR reumat* OR revmarthrit*) NEXT/3 (arthrit*<br>OR artrit* OR diseas* OR condition* OR nodule*)                          |
| #3  | felty* NEXT/2 syndrome                                                                                                                        |
| #4  | caplan* NEXT/2 syndrome                                                                                                                       |
| #5  | sjogren* NEXT/2 syndrome                                                                                                                      |
| #6  | sicca* NEXT/2 syndrome                                                                                                                        |
| #7  | 'still\$ disease'                                                                                                                             |
| #8  | 'bechterew\$ disease*'                                                                                                                        |
| #9  | #1 OR #2 OR #3 OR #4 OR #5 OR #6 OR #7 OR #8                                                                                                  |
| #10 | 'gui-zhi shao-yao zhi-mu decoction' OR 'gui-zhi decoction' OR 'shao-yao<br>decoction' OR 'zhi-mu decoction' OR (guizhi AND shaoyao AND zhimu) |
| #11 | methotrexate'/exp                                                                                                                             |
| #12 | amethopterin OR methotrexate* OR 'methotrexate sodium' OR mexate OR<br>'methotrexate hydrate' OR 'dicesium salt methotrexate'                 |
| #13 | #11 OR #12                                                                                                                                    |
| #14 | #9 AND #10 AND #13                                                                                                                            |

---

1 **Supplementary Table 2 Search Strategy for the PubMed**


---

| No. | Query                                                      |
|-----|------------------------------------------------------------|
| #1  | arthritis, rheumatoid                                      |
| #3  | rheumatoid                                                 |
| #4  | reumatoid                                                  |
| #5  | revmatoid                                                  |
| #6  | rheumatic                                                  |
| #7  | reumatic                                                   |
| #8  | rheumat*                                                   |
| #9  | reumat*                                                    |
| #10 | #3 OR #4 OR #5 OR #6 OR #7 OR #8 OR #9                     |
| #11 | arthrit*                                                   |
| #12 | artrit*                                                    |
| #13 | diseas*                                                    |
| #14 | condition*                                                 |
| #15 | nodule*                                                    |
| #16 | vasculitis*                                                |
| #17 | #11 OR #12 OR #13 OR #14 OR #15 OR #16                     |
| #18 | #10 AND #17                                                |
| #19 | felty* syndrome                                            |
| #20 | caplan* syndrome                                           |
| #21 | sjogren* syndrome                                          |
| #22 | sicca* syndrome                                            |
| #23 | still* disease                                             |
| #24 | bechterew disease                                          |
| #25 | Still's Disease, Adult-Onset                               |
| #26 | #1 OR #18 OR #19 OR #20 OR #21 OR #22 OR #23 OR #24 OR #25 |
| #27 | Methotrexate                                               |
| #28 | Amethopterin                                               |
| #29 | methotrexate sodium                                        |
| #30 | methotrexate hydrate                                       |
| #31 | dicesium salt methotrexate                                 |
| #32 | Sodium, Methotrexate                                       |
| #33 | Mexate                                                     |
| #34 | #27 OR #28 OR #29 OR #30 OR #31 OR #32 OR 33               |
| #35 | gui-zhi shao-yao zhi-mu                                    |
| #36 | guizhi shaoyao zhimu decoction                             |
| #37 | guizhi shaoyao zhimu                                       |
| #38 | gui-zhi shao-yao zhi-mu decoction                          |

**#39** #35 OR #36 OR #37 OR #38

**#40** #26 AND #34 AND #39

---

---

1 **Supplementary Table 3 Search Strategy for the Cochrane library**


---

| <b>No.</b> | <b>Query</b>                                                                                                                                         |
|------------|------------------------------------------------------------------------------------------------------------------------------------------------------|
| <b>#1</b>  | MeSH descriptor: [Arthritis, Rheumatoid] explode all trees                                                                                           |
| <b>#2</b>  | felty near/2 syndrome                                                                                                                                |
| <b>#3</b>  | caplan near/2 syndrome                                                                                                                               |
| <b>#4</b>  | sjogren* near/2 syndrome                                                                                                                             |
| <b>#5</b>  | sicca near/2 syndrome                                                                                                                                |
| <b>#6</b>  | still* next disease                                                                                                                                  |
| <b>#7</b>  | bechterew* next disease                                                                                                                              |
| <b>#8</b>  | ((rheumatoid or reumatoid or revmatoid or rheumatic or reumatic or revmatic) near/3 (arthrit* or artrit* or diseas* or condition* or nodule*)):ti,ab |
| <b>#9</b>  | #1OR#2OR#3OR#4OR#5OR#6OR#7OR#8                                                                                                                       |
| <b>#10</b> | MeSH descriptor: [Methotrexate] explode all trees                                                                                                    |
| <b>#11</b> | Guizhi decoction                                                                                                                                     |
| <b>#12</b> | shaoyao decoction                                                                                                                                    |
| <b>#13</b> | zhimu decoction                                                                                                                                      |
| <b>#14</b> | guizhi-shaoyao-zhimu decoction                                                                                                                       |
| <b>#15</b> | #11OR#12OR#13OR#14                                                                                                                                   |
| <b>#16</b> | #9AND#10AND#15                                                                                                                                       |

---

2

---

1 **Supplementary Table 4 Search Strategy for the Web of Science**


---

| No.  | Query                                                                                                                                                                                       |
|------|---------------------------------------------------------------------------------------------------------------------------------------------------------------------------------------------|
| # 1  | TS=(arthritis, rheumatoid)                                                                                                                                                                  |
| # 2  | TS=((rheumatoid OR reumatoid OR revmatoid OR rheumatic OR reumatic OR revmatic OR rheumat* OR reumat* OR revmarthrit* ) NEAR/3 (arthrit* OR artrit* OR diseas* OR condition* OR nodule* ) ) |
| # 3  | TS=(felty* NEAR/2 syndrome)                                                                                                                                                                 |
| # 4  | TS=(caplan* NEAR/2 syndrome)                                                                                                                                                                |
| # 5  | TS=(sjogren* NEAR/2 syndrome)                                                                                                                                                               |
| # 6  | TS=(sicca* NEAR/2 syndrome)                                                                                                                                                                 |
| # 7  | TS=("still\$ disease")                                                                                                                                                                      |
| # 8  | TS=("bechterew\$ disease*")                                                                                                                                                                 |
| # 9  | #1 OR #2 OR #3 OR #4 OR #5 OR #6 OR #7 OR #8                                                                                                                                                |
| # 10 | TS=("gui-zhi shao-yao zhi-mu decoction" OR "gui-zhi decoction" OR "shao-yao decoction" OR "zhi-mu decoction" OR (guizhi AND shaoyao AND zhimu) )                                            |
| # 11 | TS=(Methotrexate* OR Amethopterin OR Mexate)                                                                                                                                                |
| # 12 | #9 AND #10 AND #11                                                                                                                                                                          |

---

---

1 **Supplementary Table 5 Search Strategy for CNKI, Wanfang and VIP**

---

| No. | Query                                           |
|-----|-------------------------------------------------|
| #1  | Guizhi-shaoyao-zhimu tang [Title/Abstract]      |
| #2  | Jia an die ling [Title/Abstract]                |
| #3  | An jia die ling [Title/Abstract]                |
| #4  | MTX [Title/Abstract]                            |
| #5  | #2 OR #3 OR #4                                  |
| #6  | Lei feng shi guan jie yan [Title/Abstract]      |
| #7  | Lei feng shi xing guan jie yan [Title/Abstract] |
| #8  | Lei feng guan [Title/Abstract]                  |
| #9  | #6 OR #7 OR #8                                  |
| #10 | #1 AND #5 AND #9                                |

---

2

3

1 **Supplementary Table 6. Sensitivity Analysis**

| <b>Research content</b>                         | <b>Results</b>                         |
|-------------------------------------------------|----------------------------------------|
| <b>Fig 3-Effective rate Forest plot</b>         | <b>RR=1.24, 95% CI: 1.18 – 1.30</b>    |
| Cui 2019                                        | RR=1.25, 95% CI: 1.18 – 1.32           |
| Dong et al. 2020                                | RR=1.24, 95% CI: 1.18 – 1.31           |
| Huang et al. 2013                               | RR=1.23, 95% CI: 1.17 – 1.30           |
| Ji 2015                                         | RR=1.25, 95% CI: 1.18 – 1.32           |
| Li and Guan 2018                                | RR=1.24, 95% CI: 1.17 – 1.31           |
| Li et al. 2019                                  | RR=1.23, 95% CI: 1.16 – 1.29           |
| Liang and Yang 2013                             | RR=1.24, 95% CI: 1.18 – 1.31           |
| Wu 2014                                         | RR=1.24, 95% CI: 1.18 – 1.31           |
| Xiao 2012                                       | RR=1.23, 95% CI: 1.17 – 1.30           |
| Yu and Zhang 2010                               | RR=1.24, 95% CI: 1.17 – 1.30           |
| Yuan 2018                                       | RR=1.23, 95% CI: 1.17 – 1.30           |
| Zhang et al. 2019                               | RR=1.24, 95% CI: 1.17 – 1.31           |
| Zhou and Liu 2007                               | RR=1.23, 95% CI: 1.17 – 1.30           |
| <b>Fig 3-Partial remission rate Forest plot</b> | <b>RR=1.47, 95% CI: 1.24 – 1.75</b>    |
| Huang et al. 2013                               | RR=1.45, 95% CI: 1.21 – 1.73           |
| Ji 2015                                         | RR=1.52, 95% CI: 1.23 – 1.88           |
| Li and Guan 2018                                | RR=1.51, 95% CI: 1.25 – 1.83           |
| Li et al. 2019                                  | RR=1.47, 95% CI: 1.23 – 1.76           |
| Liang and Yang 2013                             | RR=1.48, 95% CI: 1.22 – 1.79           |
| Wu 2014                                         | RR=1.47, 95% CI: 1.22 – 1.78           |
| Xi et al. 2020                                  | RR=1.53, 95% CI: 1.33 – 1.75           |
| Yu and Zhang 2010                               | RR=1.43, 95% CI: 1.21 – 1.68           |
| Yuan 2018                                       | RR=1.47, 95% CI: 1.22 – 1.76           |
| Zhang et al. 2019                               | RR=1.45, 95% CI: 1.22 – 1.72           |
| Zhou and Liu 2007                               | RR=1.47, 95% CI: 1.23 – 1.75           |
| <b>Fig 3-Remission rate Forest plot</b>         | <b>RR=1.51, 95% CI: 1.16 – 1.95</b>    |
| Cui 2019                                        | RR=1.43, 95% CI: 1.01 – 2.04           |
| Dong et al. 2020                                | RR=1.54, 95% CI: 1.16 – 2.05           |
| Xi et al. 2020                                  | RR=1.61, 95% CI: 1.19 – 2.18           |
| Yu and Zhang 2010                               | RR=1.46, 95% CI: 1.12 – 1.89           |
| Zhou and Liu 2007                               | RR=1.49, 95% CI: 1.15 – 1.93           |
| <b>Fig 4-index CRP Forest plot</b>              | <b>RR=-1.08, 95% CI: -1.48 – -0.68</b> |
| Cui 2019                                        | RR=-0.97, 95% CI: -1.36 – -0.58        |
| Huang et al. 2013                               | RR=-1.15, 95% CI: -1.57 – -0.72        |
| Ji 2015                                         | RR=-1.03, 95% CI: -1.48 – -0.58        |
| Li and Guan 2018                                | RR=-1.04, 95% CI: -1.48 – -0.59        |

|                                    |                                        |
|------------------------------------|----------------------------------------|
| Li et al. 2019                     | RR=-1.04, 95% CI: -1.49 – -0.60        |
| Liang and Yang 2013                | RR=-1.21, 95% CI: -1.56 – -0.86        |
| Wu 2014                            | RR=-1.12, 95% CI: -1.56 – -0.69        |
| Yu and Zhang 2010                  | RR=-1.14, 95% CI: -1.57 – -0.71        |
| Zhang et al. 2019                  | RR=-1.02, 95% CI: -1.45 – -0.59        |
| <b>Fig 4-index DMS Forest plot</b> | <b>RR=-1.58, 95% CI: -2.38 – -0.78</b> |
| Huang et al. 2013                  | RR=-1.74, 95% CI: -2.67 – -0.80        |
| Li and Guan 2018                   | RR=-1.74, 95% CI: -2.71 – -0.77        |
| Liang and Yang 2013                | RR=-1.62, 95% CI: -2.55 – -0.69        |
| Wu 2014                            | RR=-1.76, 95% CI: -2.69 – -0.82        |
| Xi et al. 2020                     | RR=-1.75, 95% CI: -2.77 – -0.73        |
| Yu and Zhang 2010                  | RR=-1.74, 95% CI: -2.70 – -0.79        |
| Zhang et al. 2019                  | RR=-0.87, 95% CI: -1.09 – -0.66        |
| <b>Fig 4-index ESR Forest plot</b> | <b>RR=-1.52, 95% CI: -2.10 – -0.93</b> |
| Cui 2019                           | RR=-1.52, 95% CI: -2.18 – -0.86        |
| Huang et al. 2013                  | RR=-1.59, 95% CI: -2.23 – -0.95        |
| Ji 2015                            | RR=-1.52, 95% CI: -2.21 – -0.84        |
| Li and Guan 2018                   | RR=-1.37, 95% CI: -1.94 – -0.80        |
| Li et al. 2019                     | RR=-1.21, 95% CI: -1.66 – -0.76        |
| Liang and Yang 2013                | RR=-1.66, 95% CI: -2.24 – -1.07        |
| Wu 2014                            | RR=-1.58, 95% CI: -2.22 – -0.94        |
| Xiao 2012                          | RR=-1.65, 95% CI: -2.25 – -1.04        |
| Yu and Zhang 2010                  | RR=-1.56, 95% CI: -2.22 – -0.91        |
| Zhang et al. 2019                  | RR=-1.52, 95% CI: -2.18 – -0.87        |
| <b>Fig 4-index RF Forest plot</b>  | <b>RR=-1.36, 95% CI: -2.14 – -0.58</b> |
| Cui 2019                           | RR=-1.45, 95% CI: -2.40 – -0.51        |
| Huang et al. 2013                  | RR=-1.49, 95% CI: -2.38 – -0.60        |
| Ji 2015                            | RR=-1.27, 95% CI: -2.14 – -0.39        |
| Li et al. 2019                     | RR=-1.40, 95% CI: -2.33 – -0.48        |
| Liang and Yang 2013                | RR=-1.57, 95% CI: -2.40 – -0.73        |
| Wu 2014                            | RR=-1.49, 95% CI: -2.38 – -0.59        |
| Zhang et al. 2019                  | RR=-0.90, 95% CI: -1.44 – -0.36        |
| <b>Fig 4-index SJC Forest plot</b> | <b>RR=-0.81, 95% CI: -1.05 – -0.57</b> |
| Huang et al. 2013                  | RR=-0.80, 95% CI: -1.10 – -0.49        |
| Liang and Yang 2013                | RR=-0.72, 95% CI: -1.00 – -0.44        |
| Wu 2014                            | RR=-0.90, 95% CI: -1.18 – -0.62        |
| Yu and Zhang 2010                  | RR=-0.82, 95% CI: -1.15 – -0.50        |



---

|                                               |                                        |
|-----------------------------------------------|----------------------------------------|
| <b>Fig 4-index TJC Forest plot</b>            | <b>RR=-0.93, 95% CI: -1.28 – -0.57</b> |
| Wu 2014                                       | RR=-1.10, 95% CI: -1.37 – -0.82        |
| Xi et al. 2020                                | RR=-0.76, 95% CI: -1.19 – -0.34        |
| Yu and Zhang 2010                             | RR=-0.88, 95% CI: -1.50 – -0.26        |
| <br>                                          |                                        |
| <b>Fig 6-AEs-Gastrointestinal Forest plot</b> | <b>RR=0.46, 95% CI: 0.24 – 0.88</b>    |
| Dong et al. 2020                              | RR=0.46, 95% CI: 0.23 – 0.90           |
| Huang et al. 2013                             | RR=0.47, 95% CI: 0.25 – 0.92           |
| Li and Guan 2018                              | RR=0.44, 95% CI: 0.22 – 0.87           |
| Xi et al. 2020                                | RR=0.54, 95% CI: 0.26 – 1.10           |
| Yu and Zhang 2010                             | RR=0.46, 95% CI: 0.19 – 1.09           |
| Yuan 2018                                     | RR=0.42, 95% CI: 0.21 – 0.83           |
| <br>                                          |                                        |
| <b>Fig 6-AEs-Liver Forest plot</b>            | <b>RR=0.31, 95% CI: 0.05 – 1.90</b>    |
| Huang et al. 2013                             | RR=0.34, 95% CI: 0.04 – 3.15           |
| Yu and Zhang 2010                             | RR=0.25, 95% CI: 0.01 – 5.96           |
| <br>                                          |                                        |
| <b>Fig 6-AEs-Nervous system Forest plot</b>   | <b>RR=0.97, 95% CI: 0.24 – 3.85</b>    |
| Li and Guan 2018                              | RR=0.93, 95% CI: 0.13 – 6.74           |
| Xi et al. 2020                                | RR=1.77, 95% CI: 0.37 – 8.43           |
| Yu and Zhang 2010                             | RR=0.72, 95% CI: 0.13 – 3.84           |
| Yuan 2018                                     | RR=0.68, 95% CI: 0.11 – 4.34           |
| <br>                                          |                                        |
| <b>Fig 6-other AEs Forest plot</b>            | <b>RR=0.65, 95% CI: 0.15 – 2.83</b>    |
| Huang et al. 2013                             | RR=0.51, 95% CI: 0.05 – 5.43           |
| Yu and Zhang 2010                             | RR=0.75, 95% CI: 0.11 – 4.99           |
| <br>                                          |                                        |
| <b>Fig 5-total AEs Forest plot</b>            | <b>RR=0.46, 95% CI: 0.26 – 0.83</b>    |
| Dong et al. 2020                              | RR=0.45, 95% CI: 0.23 – 0.88           |
| Huang et al. 2013                             | RR=0.47, 95% CI: 0.23 – 0.94           |
| Li and Guan 2018                              | RR=0.42, 95% CI: 0.21 – 0.83           |
| Liang and Yang 2013                           | RR=0.50, 95% CI: 0.30 – 0.85           |
| Xi et al. 2020                                | RR=0.56, 95% CI: 0.33 – 0.94           |
| Yu and Zhang 2010                             | RR=0.43, 95% CI: 0.19 – 0.98           |
| Yuan 2018                                     | RR=0.41, 95% CI: 0.24 – 0.70           |

---

1 **Supplementary Table 7. Adverse events.**

| Author                | Yu and Zhang 2010 |    | Huang et al. 2013 |    | Liang and Yang 2013 |    | Yuan 2018 |    | Li and Guan 2018 |    | Xi et al. 2020 |    | Dong et al. 2020 |    | Total      |
|-----------------------|-------------------|----|-------------------|----|---------------------|----|-----------|----|------------------|----|----------------|----|------------------|----|------------|
|                       | A                 | B  | A                 | B  | A                   | B  | A         | B  | A                | B  | A              | B  | A                | B  |            |
| Group                 | A                 | B  | A                 | B  | A                   | B  | A         | B  | A                | B  | A              | B  | A                | B  |            |
| Number of patients    | 40                | 41 | 36                | 27 | 40                  | 38 | 44        | 44 | 45               | 45 | 75             | 80 | 30               | 30 | <b>615</b> |
| Patients with AEs     | 8                 | 16 | 2                 | 4  | 0                   | 6  | 4         | 3  | 3                | 4  | 2              | 13 | 1                | 2  | <b>68</b>  |
| Xerostomia            |                   |    |                   |    |                     |    | 1         | 1  | 1                | 2  |                |    |                  |    | <b>5</b>   |
| Oral Ulcer            | 1                 | 3  |                   |    |                     |    |           |    |                  |    |                |    |                  |    | <b>4</b>   |
| Nausea                | 2                 | 4  |                   | 1  |                     |    | 1         | 1  | 1                | 1  | 2              | 9  | 1                | 1  | <b>24</b>  |
| Epigastric Discomfort | 2                 | 4  |                   |    |                     |    |           |    |                  |    |                |    |                  |    | <b>6</b>   |
| Diarrhea              |                   |    |                   |    |                     |    |           |    |                  |    |                |    |                  | 1  | <b>1</b>   |
| Liver Damage          | 1                 |    |                   | 1  |                     |    |           |    |                  |    |                |    |                  |    | <b>2</b>   |
| Elevated Liver Enzyme |                   | 3  |                   |    |                     |    |           |    |                  |    |                |    |                  |    | <b>3</b>   |
| Vertigo               | 1                 |    |                   |    |                     |    | 2         | 1  | 1                | 1  |                | 4  |                  |    | <b>10</b>  |
| Skin Rash             | 1                 |    | 1                 |    |                     |    |           |    |                  |    |                |    |                  |    | <b>2</b>   |
| Leukopenia            |                   | 2  | 1                 | 1  |                     |    |           |    |                  |    |                |    |                  |    | <b>4</b>   |
| Fatigue               |                   |    |                   | 1  |                     |    |           |    |                  |    |                |    |                  |    | <b>1</b>   |

2 A: experimental group; B: control group
